# Supplementary material for: Enhanced light harvesting in bulk heterojunction photovoltaic devices with shape-controlled Ag nanomaterials: Ag nanoparticles versus Ag nanoplates
Source: Royal Society of Chemistry journal article supplement (doi:10.1039/c2ra20815f), 2012-01-01
Supplement: c2ra20815f.pdf [file c2ra20815f.pdf]

## Supporting Information

# Enhanced Light Harvesting in Bulk Heterojunction Photovoltaic Devices with Shape-Controlled Silver Nanomaterials: Ag Nanoparticles versus Ag Nanoplates

Dong Hwan Wang,<sup>a,b</sup> Jung Kyu Kim,<sup>b</sup> Keum Hwan Park,<sup>c</sup> O Ok Park,<sup>c,d</sup> Byungkwon  
Lim,<sup>e</sup> Jong Hyeok Park,<sup>b\*</sup>

<sup>a</sup> *Center for Polymers and Organic Solids, University of California at Santa Barbara, Santa Barbara, CA 93106-5090, USA*

<sup>b</sup> *School of Chemical Engineering and SAINT, Sungkyunkwan University, Suwon 440-746, Republic of Korea; Email: lutts@skku.edu*

<sup>c</sup> *Department of Chemical and Biomolecular Engineering, Korea Advanced Institute of Science and Technology (BK 21 Graduate Program), 373-1 Guseong-dong, Yuseong-gu, Daejeon 305-701, Republic of Korea*

<sup>d</sup> *Department of Energy Systems Engineering, Daegu Gyeongbuk Institute of Science and Technology (DGIST), 50-1, Sang-ri, Hyeonpung-myeon, Dalseong-gun, Daegu 711-873, Republic of Korea*

<sup>e</sup> *School of Advanced Materials Science and Engineering, Sungkyunkwan University, Suwon 440-746, Republic of Korea*

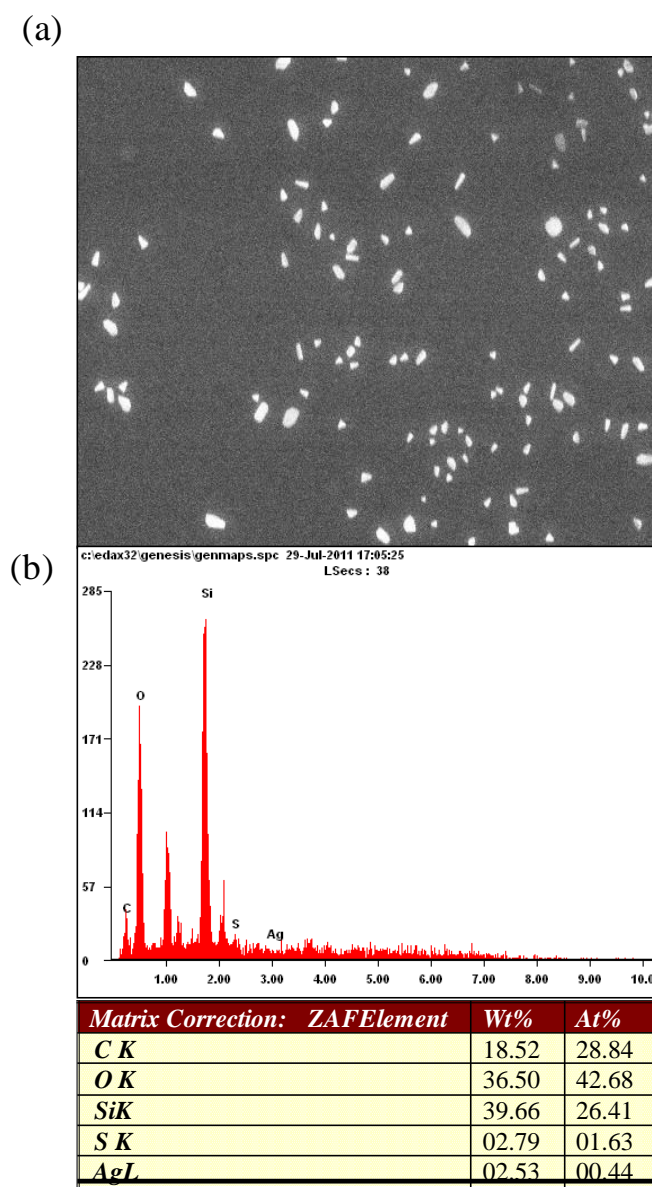

**Figure S1.** SEM and EDS images of Ag nanoplates with a ratio of 0.5 wt%. The EDS analysis shows that the shape of nanoplates consist of elemental Ag.

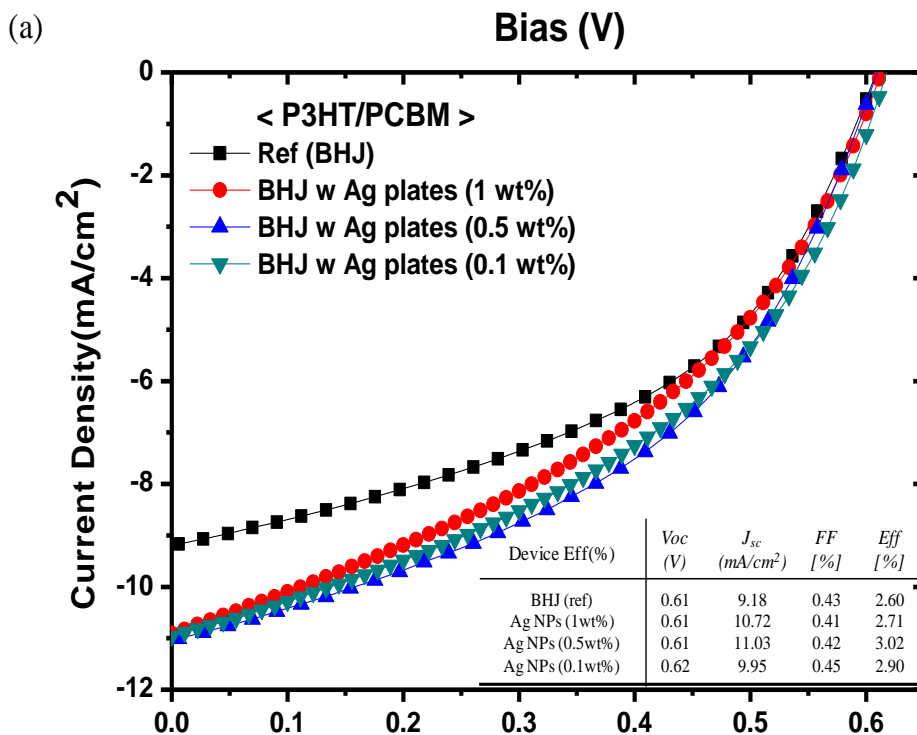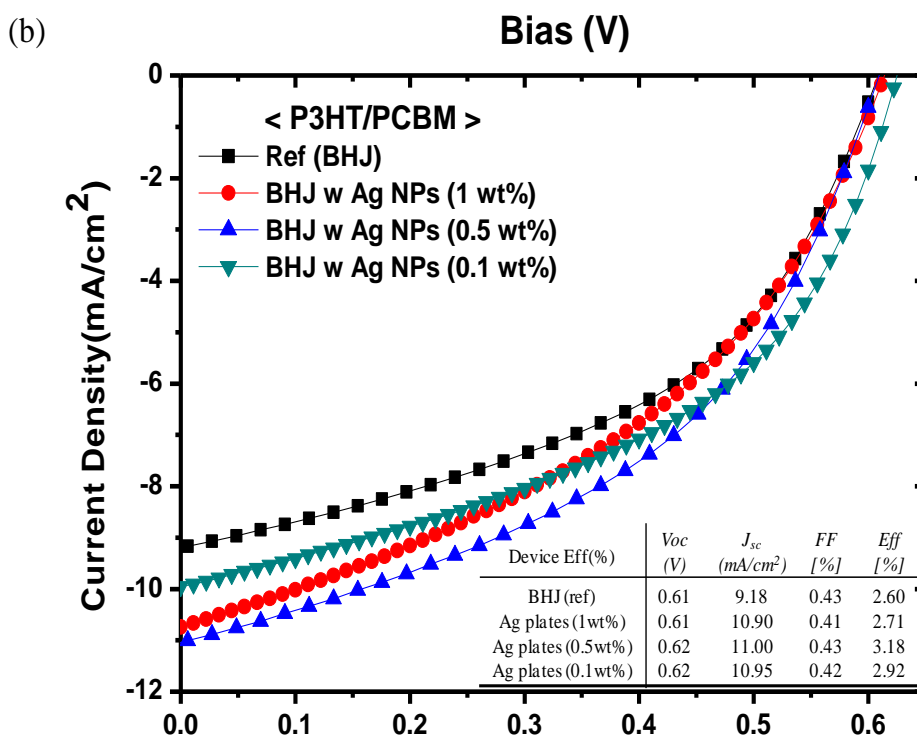

**Figure S2.** *J-V* curves of devices (pre-test) with (a) the plain P3HT/PCBM BHJ and the BHJ with the Ag nanoparticles, (b) the plain P3HT/PC<sub>61</sub>BM BHJ and the BHJ with the Ag nanoplates; the results depend on various weight ratios of the P3HT/PCBM and the Ag materials (Ag nanoparticles or Ag nanoplates) (-●- 1 wt%, -▲- 0.5 wt%, -▼- 0.1 wt%). The each inset table showed the  $V_{oc}$ ,  $J_{sc}$ ,  $FF$ , and Eff.(%) values of the P3HT/PCBM BHJ solar cells with or without Ag nanomaterials.

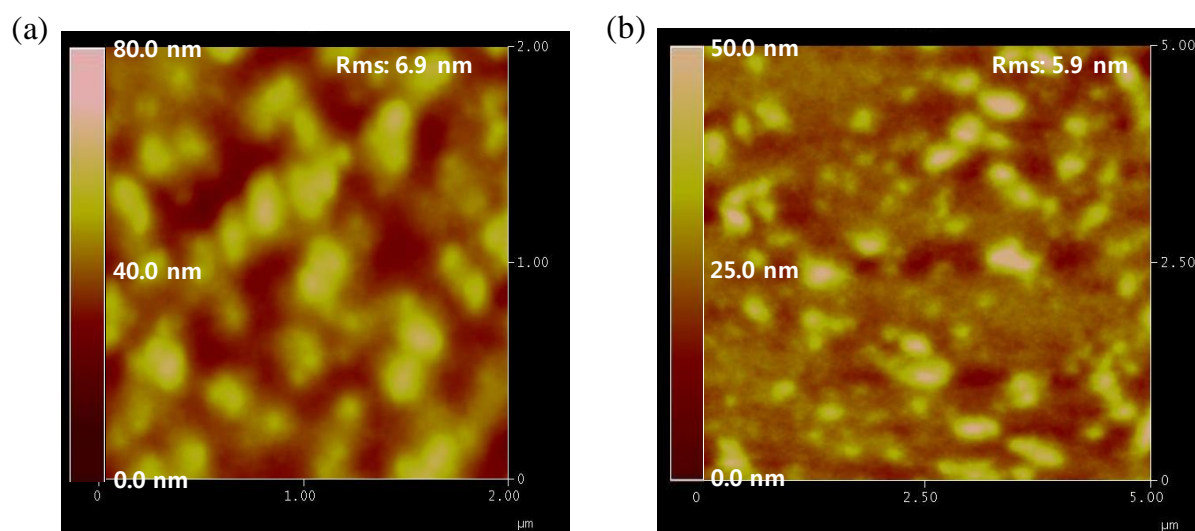

**Figure S3.** AFM 2D images of the plain P3HT/PC<sub>71</sub>BM BHJ (a) and the BHJ with Ag nanoplates (0.5 wt%) (b).

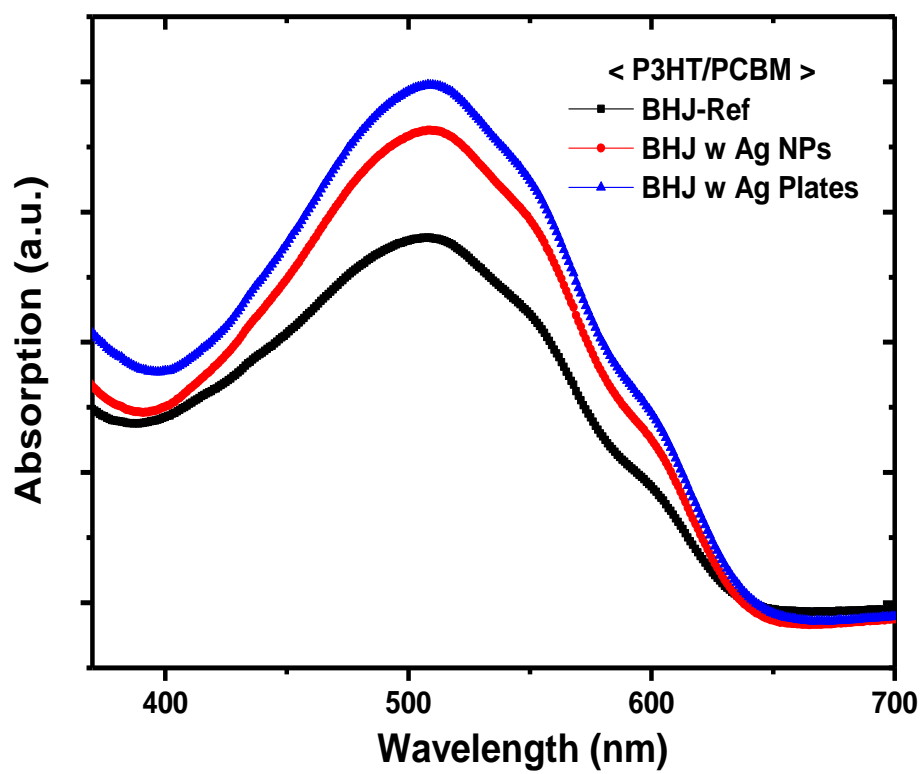

**Figure S4.** UV visible spectra of the plain P3HT/PC<sub>71</sub>BM BHJ film and the BHJ film with Ag nanoparticles or Ag nanoplates (0.5 wt%) as a function of wavelength.

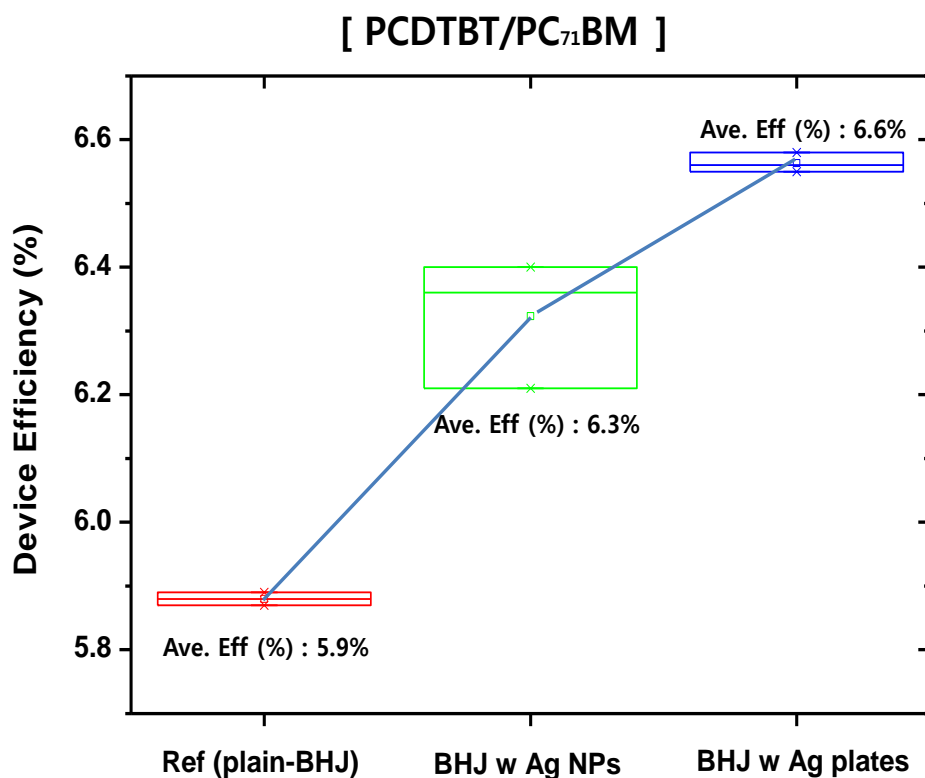

**Figure S5.** The average PCDTBT/PC<sub>71</sub>BM device efficiencies of plain BHJ (reference device), BHJ with Ag NPs, and BHJ with Ag nanoplates. The BHJ with Ag nanoplates (6.6 %) showed 11% increased average power conversion efficiency (more than ten samples were tested) than the plain-BHJ without Ag materials (5.9 %).

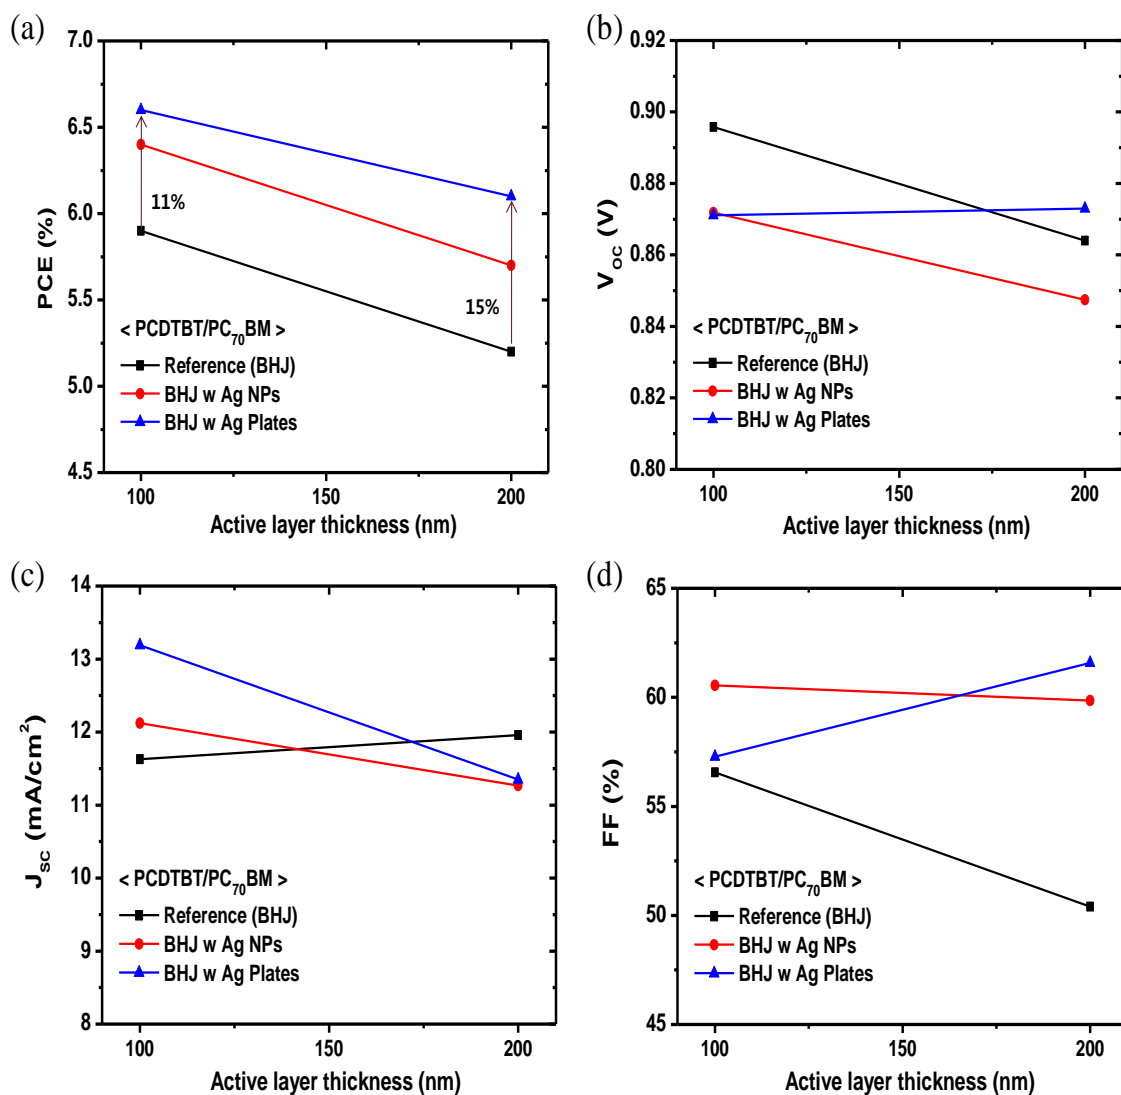

**Figure S6.** Results of the fabricated photovoltaic devices with the plain PCDTBT/PC<sub>71</sub>BM BHJ, the BHJ with Ag NPs, and the BHJ with Ag nanoplates as a function of the active layer thickness from 100 nm and 200 nm: (a) PCE (%), (b) V<sub>oc</sub> (V), (c) J<sub>sc</sub> (mA/cm<sup>2</sup>), and (d) FF (%).



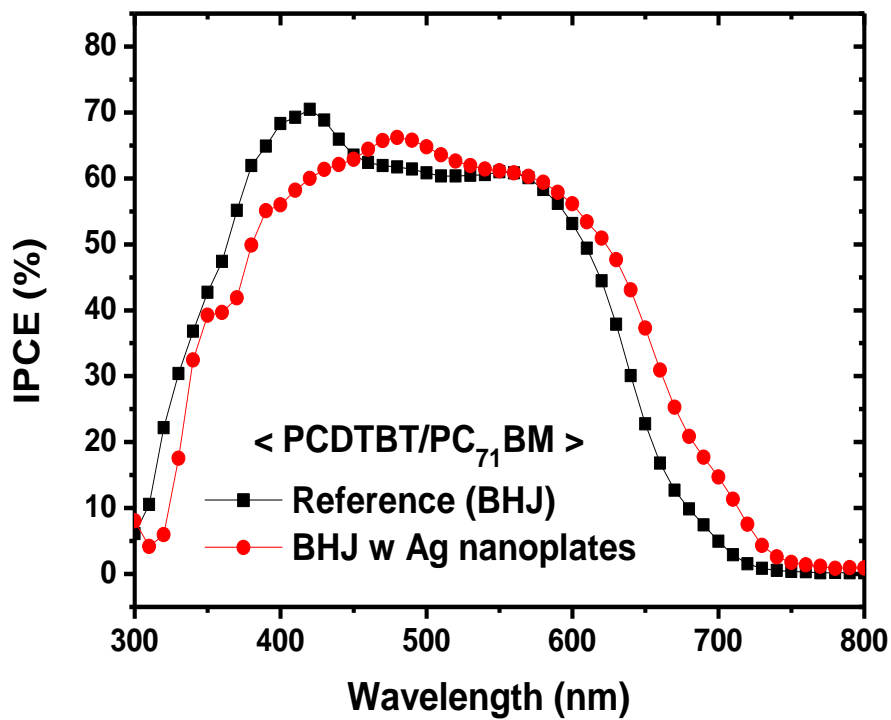

**Figure S7.** Incident photon to current efficiency (IPCE) spectra of the devices from PCDTBT/PC<sub>71</sub>BM BHJ with and without Ag nanoplates.
